# Supplementary material for: Hypoxia Is Not a Main Stress When Mycobacterium tuberculosis Is in a Dormancy-Like Long-Chain Fatty Acid Environment
Source: Front Cell Infect Microbiol. 2019 Jan 9;8:449. doi: 10.3389/fcimb.2018.00449 (PMC6333855; doi:10.3389/fcimb.2018.00449)
Supplement: Supplementary Table S3 — RPKM values and functional categories of overexpressed M. tuberculosis genes. [file Table_3.XLSX]

## Sheet: Upregulated DE vs DNRP1
Table S1. Functional categories of overexpressed M. tuberculosis genes
Supplementary Table S3: RPKM values and functional categories of overexpressed M. tuberculosis genes
Genes	Gene-Name	DE-RPKMs	DNRP1-RPKMs	FDR	Functional category	Function
Rv0006	gyrA	39	11	0.0467128	2	DNA gyrase subunit A
Rv0009	ppiA	21	3	0.0319722	2	iron-regulated peptidyl-prolyl cis-trans isomerase A
Rv0019c	0	44	12	0.023193	9	hypothetical protein
Rv0020c	TB39.8	48	15	0.0373589	9	hypothetical protein
Rv0025	0	17	2	0.0451644	10	hypothetical protein
Rv0040c	mtc28	34	2	4.24311e-05	3	hypothetical protein
Rv0055	rpsR	81	17	1.77303e-05	2	30S ribosomal protein S18
Rv0056	rplI	75	19	0.000344856	2	50S ribosomal protein L9
Rv0057	0	61	9	8.04281e-06	10	hypothetical protein
Rv0058	dnaB	17	2	0.0451644	2	replicative DNA helicase
Rv0060	0	34	5	0.00206652	10	hypothetical protein
Rv0073	0	41	7	0.00147826	3	glutamine-transport ABC transporter ATP-binding protein
Rv0129c	fbpC	76	8	8.57138e-09	1	secreted antigen 85-C FbpC
Rv0141c	0	28	6	0.04262	10	hypothetical protein
Rv0157	pntB	28	3	0.00265588	7	NAD(P) transhydrogenase subunit beta
Rv0163	0	15	1	0.0240135	10	hypothetical protein
Rv0167	yrbE1A	27	3	0.00422872	0	hypothetical protein
Rv0168	yrbE1B	23	3	0.0140322	0	hypothetical protein
Rv0169	mce1A	26	2	0.00125987	0	MCE-family protein MCE1A
Rv0170	mce1B	61	4	8.92707e-09	0	MCE-family protein MCE1B
Rv0171	mce1C	56	3	1.40189e-08	0	MCE-family protein MCE1C
Rv0172	mce1D	33	2	6.85965e-05	0	MCE-family protein MCE1D
Rv0173	lprK	49	3	2.91012e-07	3	MCE-family lipoprotein LprK
Rv0174	mce1F	63	8	1.24861e-06	0	MCE-family protein MCE1F
Rv0175	0	64	20	0.0116587	3	mce associated membrane protein
Rv0177	0	53	14	0.00754727	10	MCE associated protein
Rv0220	lipC	29	6	0.0295438	7	esterase
Rv0227c	0	27	2	0.000779755	3	hypothetical protein
Rv0236A	0	36	9	0.0319373	3	hypothetical protein
Rv0242c	fabG	49	9	0.00068791	1	3-ketoacyl-ACP reductase
Rv0243	fadA2	76	16	3.95542e-05	1	acetyl-CoA acetyltransferase
Rv0265c	0	24	3	0.00928488	3	periplasmic IRON-transport lipoprotein
Rv0270	fadD2	28	6	0.04262	1	acyl-CoA synthetase
Rv0274	0	42	5	0.000100817	10	hypothetical protein
Rv0281	0	44	10	0.00561709	1	hypothetical protein
Rv0284	0	42	12	0.0311759	3	hypothetical protein
Rv0285	PE5	94	14	1.39442e-08	6	PE family protein
Rv0286	PPE4	143	6	2.16563e-23	6	PPE family protein
Rv0287	esxG	315	32	4.53778e-37	3	hypothetical protein
Rv0288	esxH	293	14	1.77907e-46	3	low molecular weight protein antigen 7
Rv0289	0	188	38	6.77235e-13	3	hypothetical protein
Rv0290	0	41	7	0.00147826	3	transmembrane protein
Rv0291	mycP3	27	5	0.0214808	7	hypothetical protein
Rv0292	0	32	3	0.000412244	3	transmembrane protein
Rv0308	0	52	2	1.18477e-08	3	hypothetical protein
Rv0309	0	44	11	0.0102498	3	hypothetical protein
Rv0338c	0	55	5	6.35685e-07	7	iron-sulfur-binding reductase
Rv0341	iniB	152	8	3.57602e-23	3	isoniazid inductible gene protein INIB
Rv0342	iniA	32	5	0.00471007	3	isoniazid inductible gene protein INIA
Rv0363c	fba	52	8	9.06127e-05	7	fructose-bisphosphate aldolase
Rv0379	secE2	90	8	2.66363e-11	3	protein transport protein
Rv0418	lpqL	15	1	0.0240135	3	lipoprotein aminopeptidase LpqL
Rv0424c	0	60	9	1.22515e-05	10	hypothetical protein
Rv0430	0	83	21	0.000148041	10	hypothetical protein
Rv0443	0	171	13	4.04287e-23	10	hypothetical protein
Rv0455c	0	72	24	0.0117003	10	hypothetical protein
Rv0462	lpd	41	6	0.000426537	7	dihydrolipoamide dehydrogenase
Rv0463	0	20	2	0.0125149	3	hypothetical protein
Rv0469	umaA	55	19	0.0472761	1	mycolic acid synthase
Rv0495c	0	22	4	0.0461318	10	hypothetical protein
Rv0496	0	37	9	0.0231607	10	hypothetical protein
Rv0500A	0	90	24	0.000150683	10	hypothetical protein
Rv0500B	0	137	42	2.3947e-05	10	hypothetical protein
Rv0505c	serB1	20	3	0.0479181	7	phosphoserine phosphatase
Rv0506	mmpS2	29	4	0.00444151	3	hypothetical protein
Rv0510	hemC	207	27	8.44847e-21	7	porphobilinogen deaminase
Rv0525	0	20	3	0.0479181	10	hypothetical protein
Rv0558	ubiE	34	7	0.0139574	7	ubiquinone/menaquinone biosynthesis methyltransferase
Rv0569	0	287	61	1.26771e-18	10	hypothetical protein
Rv0577	TB27.3	47	13	0.0153324	10	hypothetical protein
Rv0580c	0	31	5	0.00692914	10	hypothetical protein
Rv0599c	0	64	11	1.99519e-05	0	hypothetical protein
Rv0605	0	45	11	0.0103276	5	resolvase
Rv0608	0	95	16	5.1422e-08	0	hypothetical protein
Rv0626	0	24	4	0.0220572	0	hypothetical protein
Rv0632c	echA3	60	9	1.22515e-05	1	enoyl-CoA hydratase
Rv0634A	0	216	17	1.14898e-28	10	hypothetical protein
Rv0635	0	54	16	0.0144843	7	(3R)-hydroxyacyl-ACP dehydratase subunit HadA
Rv0636	0	103	33	0.000720701	7	(3R)-hydroxyacyl-ACP dehydratase subunit HadB
Rv0640	rplK	92	34	0.012849	2	50S ribosomal protein L11
Rv0642c	mmaA4	37	4	0.000208687	1	methoxy mycolic acid synthase
Rv0652	rplL	33	7	0.0198112	2	50S ribosomal protein L7/L12
Rv0659c	0	139	46	9.69322e-05	0	hypothetical protein
Rv0660c	0	151	42	6.34003e-07	0	hypothetical protein
Rv0703	rplW	243	59	2.54998e-13	2	50S ribosomal protein L23
Rv0704	rplB	114	24	1.50346e-07	2	50S ribosomal protein L2
Rv0705	rpsS	129	28	2.76204e-08	2	30S ribosomal protein S19
Rv0706	rplV	38	8	0.00934519	2	50S ribosomal protein L22
Rv0707	rpsC	90	15	1.11496e-07	2	30S ribosomal protein S3
Rv0708	rplP	148	22	1.49612e-13	2	50S ribosomal protein L16
Rv0709	rpmC	369	41	3.56851e-41	2	50S ribosomal protein L29
Rv0710	rpsQ	241	26	2.51323e-27	2	30S ribosomal protein S17
Rv0710	rpsQ	241	26	2.51323e-27	2	30S ribosomal protein S17
Rv0717	rpsN	162	63	0.000929122	2	30S ribosomal protein S14
Rv0718	rpsH	88	19	7.77377e-06	2	30S ribosomal protein S8
Rv0719	rplF	139	42	1.36888e-05	2	50S ribosomal protein L6
Rv0720	rplR	86	16	1.265e-06	2	50S ribosomal protein L18
Rv0721	rpsE	184	52	4.25685e-08	2	30S ribosomal protein S5
Rv0722	rpmD	141	28	6.43793e-10	2	50S ribosomal protein L30
Rv0723	rplO	221	27	3.79613e-23	2	50S ribosomal protein L15
Rv0733	adk	44	10	0.00561709	7	adenylate kinase
Rv0757	phoP	73	28	0.0449838	9	two component system response transcriptional positive regulator PHOP
Rv0787A	0	93	27	0.000365686	10	phosphoribosylformylglycinamidine synthase subunit PurS
Rv0810c	0	128	30	1.46598e-07	10	hypothetical protein
Rv0823c	0	32	51	0.00158573	9	transcriptional regulatory protein
Rv0827c	0	40	9	0.00861583	9	transcriptional regulatory protein
Rv0829	0	11	0	0.0245282	5	hypothetical protein
Rv0831c	0	35	8	0.0180356	10	hypothetical protein
Rv0860	fadB	61	17	0.00535563	1	fatty oxidation protein FadB
Rv0863	0	73	11	1.14452e-06	10	hypothetical protein
Rv0873	fadE10	23	4	0.0319464	1	acyl-CoA dehydrogenase
Rv0883c	0	17	2	0.0451644	10	hypothetical protein
Rv0896	gltA	66	6	3.17914e-08	7	type II citrate synthase
Rv0909	0	27	4	0.0100558	10	hypothetical protein
Rv0910	0	21	3	0.0319722	10	hypothetical protein
Rv0931c	pknD	54	16	0.0144843	9	Ser/Thr protein kinase D
Rv0932c	pstS2	81	28	0.0113883	3	phosphate ABC transporter substrate-binding protein
Rv0934	pstS1	18	2	0.0292565	3	phosphate ABC transporter substrate-binding protein
Rv0935	pstC1	56	8	1.69809e-05	3	phosphate ABC transporter transmembrane protein
Rv0938	0	19	3	0.0468693	2	ATP-dependent DNA ligase
Rv0951	sucC	71	13	1.36744e-05	7	succinyl-CoA synthetase subunit beta
Rv0952	sucD	37	7	0.00469196	7	succinyl-CoA synthetase subunit alpha
Rv0954	0	103	25	7.17128e-06	3	transmembrane protein
Rv0961	0	89	36	0.0435702	3	hypothetical protein
Rv0994	moeA1	53	13	0.00320997	7	molybdopterin biosynthesis protein MoeA1
Rv0996	0	95	15	2.13293e-08	3	transmembrane protein
Rv1017c	prsA	19	3	0.0468693	7	ribose-phosphate pyrophosphokinase
Rv1055	0	55	4	1.7796e-07	5	hypothetical protein
Rv1077	cbs	53	6	5.34439e-06	7	cystathionine beta-synthase
Rv1078	pra	84	13	1.53006e-07	10	hypothetical protein
Rv1092c	coaA	21	2	0.00805575	7	pantothenate kinase
Rv1094	desA2	203	70	4.91133e-06	1	acyl-ACP desaturase
Rv1107c	xseB	45	14	0.0429842	2	exodeoxyribonuclease VII small subunit
Rv1109c	0	40	7	0.00221792	10	hypothetical protein
Rv1127c	ppdK	34	7	0.0139574	7	pyruvate phosphate dikinase
Rv1133c	metE	93	17	2.61297e-07	7	5- methyltetrahydropteroyltriglutamate/homocysteine S-methyltransferase
Rv1156	0	205	23	9.81649e-23	10	hypothetical protein
Rv1159A	phhB	64	9	3.44752e-06	10	pterin-4-alpha-carbinolamine dehydratase
Rv1173	fbiC	62	11	4.33797e-05	7	FO synthase
Rv1197	esxK	222	90	0.000241223	3	Esat-6 like protein esxK (Esat-6 like protein 3)
Rv1198	esxL	392	144	8.69758e-10	3	ESAT-6 like protein ESXL (ESAT-6 like protein 4)
Rv1211	0	358	56	2.57864e-31	10	hypothetical protein
Rv1232c	0	30	4	0.00295081	10	hypothetical protein
Rv1233c	0	126	2	4.32564e-24	3	hypothetical protein
Rv1240	mdh	27	3	0.00422872	7	malate dehydrogenase
Rv1274	lprB	230	89	4.08252e-05	3	lipoprotein LprB
Rv1289	0	17	2	0.0451644	10	hypothetical protein
Rv1293	lysA	41	11	0.0256854	7	diaminopimelate decarboxylase LysA
Rv1298	rpmE	272	250	0.00515289	2	50S ribosomal protein L31
Rv1305	atpE	146	28	9.16477e-11	7	ATP synthase F0F1 subunit C
Rv1322A	0	76	20	0.000603401	10	hypothetical protein
Rv1331	clpS	509	72	1.78094e-48	10	ATP-dependent Clp protease adaptor protein ClpS
Rv1352	0	21	3	0.0319722	10	hypothetical protein
Rv1379	pyrR	46	13	0.0206443	9	bifunctional pyrimidine regulatory protein PyrR/uracil phosphoribosyltransferase
Rv1388	mihF	157	28	2.35579e-12	2	integration host factor MIHF
Rv1389	gmk	35	3	0.000172433	7	guanylate kinase
Rv1410c	0	55	13	0.00229413	3	aminoglycosides/tetracycline-transport integral membrane protein
Rv1411c	lprG	38	10	0.028775	3	lipoprotein LprG
Rv1415	ribA2	33	8	0.0348925	7	bifunctional 3,4-dihydroxy-2-butanone 4-phosphate synthase/GTP cyclohydrolase II protein
Rv1424c	0	14	1	0.0377975	3	hypothetical protein
Rv1435c	0	24	4	0.0220572	3	proline, glycine, valine-rich secreted protein
Rv1436	gap	20	3	0.0479181	7	glyceraldehyde-3-phosphate dehydrogenase
Rv1437	pgk	37	4	0.000208687	7	phosphoglycerate kinase
Rv1438	tpiA	41	4	5.33199e-05	7	triosephosphate isomerase
Rv1440	secG	25	5	0.0446976	3	preprotein translocase subunit SecG
Rv1476	0	23	1	0.00081446	3	hypothetical protein
Rv1477	0	19	2	0.0189411	0	invasion protein
Rv1487	0	55	18	0.0327473	3	hypothetical protein
Rv1488	0	41	11	0.0256854	3	hypothetical protein
Rv1498A	0	27	3	0.00422872	10	hypothetical protein
Rv1508c	0	17	2	0.0451644	3	hypothetical protein
Rv1539	lspA	82	23	0.000808282	3	lipoprotein signal peptidase
Rv1611	trpC	38	8	0.00934519	7	indole-3-glycerol phosphate synthase
Rv1613	trpA	38	9	0.0167094	7	tryptophan synthase subunit alpha
Rv1614	lgt	51	6	1.34362e-05	3	prolipoprotein diacylglyceryl transferase
Rv1626	0	60	12	0.000198469	9	two-component system transcriptional regulator
Rv1677	dsbF	20	3	0.0479181	3	lipoprotein DsbF
Rv1697	0	30	4	0.00295081	10	hypothetical protein
Rv1738	0	504	158	7.04816e-18	10	hypothetical protein
Rv1749c	0	36	9	0.0319373	3	hypothetical protein
Rv1765c	0	36	7	0.00670517	10	hypothetical protein
Rv1770	0	47	6	4.93427e-05	10	hypothetical protein
Rv1793	esxN	180	68	0.000191105	3	ESAT-6 like protein ESXN (ESAT-6 like protein 5)
Rv1799	lppT	48	10	0.00199996	3	lipoprotein LppT
Rv1815	0	38	4	0.000134848	10	hypothetical protein
Rv1827	cfp17	241	87	2.03623e-06	10	hypothetical protein
Rv1883c	0	138	10	6.35992e-19	10	hypothetical protein
Rv1884c	rpfC	121	2	3.78783e-23	3	resuscitation-promoting factor RpfC
Rv1886c	fbpB	35	5	0.00137428	1	secreted antigen 85-B FbpB
Rv1891	0	38	7	0.00324055	10	hypothetical protein
Rv1893	0	17	1	0.00982133	10	hypothetical protein
Rv1915	aceAa	33	8	0.0348925	7	isocitrate lyase
Rv1919c	0	40	6	0.000642383	10	hypothetical protein
Rv1925	fadD31	89	20	1.49889e-05	1	fatty-acid--CoA ligase
Rv1926c	mpt63	32	8	0.0475455	3	hypothetical protein
Rv1932	tpx	25	5	0.0446976	0	thiol peroxidase
Rv1959c	0	17	44	9.6206e-06	0	hypothetical protein
Rv1987	0	45	5	4.31547e-05	3	chitinase
Rv2007c	fdxA	846	162	1.22815e-61	7	ferredoxin FDXA
Rv2015c	0	32	6	0.0100727	10	hypothetical protein
Rv2022c	0	16	48	4.5063e-07	10	hypothetical protein
Rv2031c	hspX	450	124	2.74674e-20	0	heat shock protein hspX
Rv2074	0	31	5	0.00692914	7	hypothetical protein
Rv2102	0	36	4	0.000321573	10	hypothetical protein
Rv2137c	0	489	110	1.59839e-29	10	hypothetical protein
Rv2144c	0	194	81	0.00147133	3	transmembrane protein
Rv2147c	0	45	8	0.000998721	10	hypothetical protein
Rv2154c	ftsW	33	6	0.0069598	3	FtsW-like protein FtsW
Rv2172c	0	13	25	0.0156466	10	hypothetical protein
Rv2185c	TB16.3	103	18	2.38722e-08	10	hypothetical protein
Rv2190c	0	36	8	0.0131395	0	hypothetical protein
Rv2193	ctaE	92	14	2.01751e-08	7	cytochrome C oxidase subunit III
Rv2194	qcrC	82	11	3.53972e-08	7	ubiquinol-cytochrome C reductase QcrC(cytochrome C subunit)
Rv2195	qcrA	80	13	5.3302e-07	7	Rieske iron-sulfur protein QcrA
Rv2196	qcrB	95	14	8.91875e-09	7	ubiquinol-cytochrome C reductase QcrB (cytochrome B subunit)
Rv2198c	mmpS3	35	6	0.00484883	3	hypothetical protein
Rv2200c	ctaC	49	12	0.00488795	7	transmembrane cytochrome C oxidase subunit II CtaC
Rv2215	dlaT	39	7	0.00331407	7	dihydrolipoamide acetyltransferase
Rv2216	0	34	7	0.0139574	10	hypothetical protein
Rv2220	glnA1	37	7	0.00469196	7	glutamine synthetase
Rv2239c	0	61	13	0.000405449	10	hypothetical protein
Rv2241	aceE	28	4	0.00661515	7	pyruvate dehydrogenase subunit E1
Rv2244	acpP	746	340	6.90003e-09	1	acyl carrier protein
Rv2245	kasA	261	228	0.0360357	1	3-oxoacyl-ACP synthase
Rv2280	0	37	6	0.00215867	7	dehydrogenase
Rv2302	0	53	13	0.00320997	10	hypothetical protein
Rv2309c	0	16	1	0.0151898	5	hypothetical protein
Rv2314c	0	22	4	0.0461318	10	hypothetical protein
Rv2338c	moeW	33	3	0.000262996	7	hypothetical protein
Rv2346c	esxO	120	26	9.08285e-08	3	ESAT-6 like protein ESXO (ESAT-6 like protein 6)
Rv2352c	PPE38	67	22	0.0151228	6	PPE family protein
Rv2356c	PPE40	47	6	4.93427e-05	6	PPE family protein
Rv2430c	PPE41	60	20	0.0253322	6	PPE family protein
Rv2441c	rpmA	112	42	0.00537325	2	50S ribosomal protein L27
Rv2442c	rplU	135	52	0.00274096	2	50S ribosomal protein L21
Rv2457c	clpX	74	18	0.000270482	7	ATP-dependent protease ATP-binding subunit ClpX
Rv2477c	0	74	18	0.000270482	3	ABC transporter ATP-binding protein
Rv2507	0	23	3	0.0140322	3	hypothetical protein
Rv2521	bcp	47	6	4.93427e-05	0	bacterioferritin comigratory protein BCP
Rv2556c	0	81	14	1.26727e-06	10	hypothetical protein
Rv2574	0	30	5	0.0104119	10	hypothetical protein
Rv2576c	0	103	14	4.0533e-10	3	hypothetical protein
Rv2594c	ruvC	37	4	0.000208687	2	Holliday junction resolvase
Rv2605c	tesB2	29	4	0.00444151	1	acyl-CoA thioesterase
Rv2606c	0	58	9	2.7825e-05	7	pyridoxal biosynthesis lyase PdxS
Rv2633c	0	39	9	0.0121539	10	hypothetical protein
Rv2708c	0	72	10	4.27673e-07	10	hypothetical protein
Rv2721c	0	27	3	0.00422872	3	hypothetical protein
Rv2732c	0	38	9	0.0167094	3	transmembrane protein
Rv2737c	recA	33	6	0.0069598	2	DNA recombination protein RecA
Rv2748c	ftsK	45	5	4.31547e-05	3	DNA translocase FtsK
Rv2773c	dapB	20	3	0.0479181	7	dihydrodipicolinate reductase
Rv2789c	fadE21	20	2	0.0125149	1	acyl-CoA dehydrogenase
Rv2791c	0	185	37	6.78614e-13	5	transposase
Rv2816c	0	27	0	1.42333e-05	10	hypothetical protein
Rv2830c	0	88	10	8.10441e-10	0	hypothetical protein
Rv2881c	cdsA	27	4	0.0100558	1	integral membrane phosphatidate cytidylyltransferase CdsA
Rv2882c	frr	33	6	0.0069598	2	ribosome recycling factor
Rv2883c	pyrH	50	8	0.000138003	7	uridylate kinase
Rv2901c	0	74	18	0.000270482	10	hypothetical protein
Rv2908c	0	44	9	0.00302105	10	hypothetical protein
Rv2921c	ftsY	30	4	0.00295081	3	cell division protein FtsY
Rv2923c	0	27	5	0.0214808	10	hypothetical protein
Rv2925c	rnc	80	20	0.000164078	2	ribonuclease III
Rv2927c	0	159	11	3.12382e-22	10	hypothetical protein
Rv2928	tesA	48	3	4.70936e-07	1	thioesterase
Rv2929	0	23	2	0.00530165	10	hypothetical protein
Rv2941	fadD28	61	11	6.36614e-05	1	acyl-CoA synthetase
Rv2945c	lppX	36	2	1.59921e-05	3	lipoprotein LppX
Rv2947c	pks15	99	26	4.661e-05	1	polyketide synthase
Rv2959c	0	39	10	0.0212739	7	methyltransferase
Rv2969c	0	31	6	0.0144676	3	hypothetical protein
Rv2986c	hupB	138	10	6.35992e-19	2	DNA-binding protein HU
Rv2996c	serA1	33	6	0.0069598	7	D-3-phosphoglycerate dehydrogenase
Rv3001c	ilvC	62	15	0.000967537	7	ketol-acid reductoisomerase
Rv3005c	0	35	6	0.00484883	10	hypothetical protein
Rv3010c	pfkA	70	8	8.25067e-08	7	6-phosphofructokinase
Rv3028c	fixB	43	12	0.0314534	7	electron transfer flavoprotein subunit alpha
Rv3029c	fixA	142	19	4.4449e-14	7	electron transfer flavoprotein subunit beta
Rv3043c	ctaD	43	8	0.00147418	7	cytochrome C oxidase polypeptide I
Rv3075c	0	77	6	2.39934e-10	10	hypothetical protein
Rv3076	0	37	6	0.00215867	10	hypothetical protein
Rv3119	moaE1	44	13	0.0364554	7	molybdenum cofactor biosynthesis protein E
Rv3123	0	36	6	0.00323661	10	hypothetical protein
Rv3127	0	59	16	0.00445091	10	hypothetical protein
Rv3130c	tgs1	161	25	3.53126e-14	1	triacylglycerol synthase
Rv3145	nuoA	32	5	0.00471007	7	NADH dehydrogenase subunit A
Rv3146	nuoB	49	2	5.56574e-08	7	NADH dehydrogenase subunit B
Rv3147	nuoC	33	3	0.000262996	7	NADH dehydrogenase subunit C
Rv3148	nuoD	28	2	0.000489614	7	NADH dehydrogenase subunit D
Rv3149	nuoE	14	1	0.0377975	7	NADH dehydrogenase subunit E
Rv3150	nuoF	23	1	0.00081446	7	NADH dehydrogenase I subunit F
Rv3151	nuoG	20	3	0.0479181	7	NADH dehydrogenase subunit G
Rv3152	nuoH	18	1	0.010233	7	NADH dehydrogenase subunit H
Rv3153	nuoI	40	4	8.61604e-05	7	NADH dehydrogenase subunit I
Rv3154	nuoJ	25	4	0.0223568	7	NADH dehydrogenase subunit J
Rv3155	nuoK	15	1	0.0240135	7	NADH dehydrogenase subunit K
Rv3156	nuoL	44	3	3.56587e-06	7	NADH dehydrogenase subunit L
Rv3157	nuoM	18	2	0.0292565	7	NADH dehydrogenase subunit M
Rv3158	nuoN	21	2	0.00805575	7	NADH dehydrogenase subunit N
Rv3171c	hpx	37	7	0.00469196	0	haloperoxidase
Rv3193c	0	22	4	0.0461318	3	hypothetical protein
Rv3208A	TB9.4	165	11	2.72303e-23	10	hypothetical protein
Rv3213c	0	51	5	2.75189e-06	3	SOJ/PARA-like protein
Rv3217c	0	46	12	0.0126597	3	hypothetical protein
Rv3219	whiB1	436	393	0.00058252	9	transcriptional regulatory protein WHIB-like WHIB1
Rv3224	0	29	5	0.0103484	7	short-chain dehydrogenase
Rv3224A	0	28	2	0.000489614	10	hypothetical protein
Rv3224B	0	17	1	0.00982133	10	hypothetical protein
Rv3238c	0	22	2	0.00521676	3	hypothetical protein
Rv3243c	0	20	3	0.0479181	10	hypothetical protein
Rv3246c	mtrA	163	12	3.14628e-22	9	two component sensory transduction transcriptional regulatory protein MTRA
Rv3264c	manB	37	8	0.013398	3	D-alpha-D-mannose-1-phosphate guanylyltransferase
Rv3273	0	23	2	0.00530165	7	transmembrane carbonic anhydrase
Rv3274c	fadE25	58	7	2.59068e-06	1	acyl-CoA dehydrogenase
Rv3281	0	69	9	3.83639e-07	1	hypothetical protein
Rv3301c	phoY1	39	8	0.00645201	3	phosphate transporter PhoU
Rv3321c	0	26	4	0.0150098	0	hypothetical protein
Rv3376	0	37	8	0.013398	10	hypothetical protein
Rv3389c	0	103	10	1.70438e-12	7	dehydrogenase
Rv3407	0	1473	140	9.71991e-182	0	hypothetical protein
Rv3408	0	126	53	0.0180211	0	hypothetical protein
Rv3413c	0	22	3	0.0212782	10	hypothetical protein
Rv3414c	sigD	53	5	1.67695e-06	2	RNA polymerase sigma factor SigD
Rv3429	PPE59	42	7	0.000981321	6	PPE family protein
Rv3435c	0	46	6	7.47767e-05	3	transmembrane protein
Rv3477	PE31	329	30	6.02539e-41	6	PE family protein
Rv3478	PPE60	166	33	1.13829e-11	6	PE family protein
Rv3489	0	87	23	0.000168089	10	hypothetical protein
Rv3503c	fdxD	340	66	2.42383e-24	7	ferredoxin FdxD
Rv3528c	0	15	1	0.0240135	10	hypothetical protein
Rv3579c	0	54	13	0.003256	7	tRNA/rRNA methyltransferase
Rv3582c	ispD	248	118	0.00805485	7	2-C-methyl-D-erythritol 4-phosphate cytidylyltransferase
Rv3583c	0	833	206	2.51921e-44	9	transcription factor
Rv3587c	0	35	4	0.000509005	3	hypothetical protein
Rv3596c	clpC1	97	104	0.0103599	7	ATP-dependent protease ATP-binding subunit ClpC1
Rv3597c	lsr2	232	44	4.70479e-17	2	iron-regulated LSR2 protein precursor
Rv3604c	0	19	3	0.0468693	3	transmembrane protein
Rv3615c	0	304	79	4.99981e-15	3	hypothetical protein
Rv3616c	0	219	100	0.00553103	3	hypothetical protein
Rv3632	0	15	1	0.0240135	3	hypothetical protein
Rv3648c	cspA	2148	89	0	0	cold shock protein A
Rv3675	0	23	4	0.0319464	3	hypothetical protein
Rv3678A	0	79	15	6.21575e-06	10	hypothetical protein
Rv3678c	0	111	14	1.72324e-11	10	hypothetical protein
Rv3688c	0	22	3	0.0212782	10	hypothetical protein
Rv3711c	dnaQ	29	3	0.00163422	2	DNA polymerase III subunit epsilon
Rv3723	0	42	12	0.0311759	3	transmembrane protein
Rv3759c	proX	20	2	0.0125149	0	betaine/glycine ABC transporter substrate-binding protein
Rv3763	lpqH	58	10	6.33895e-05	3	hypothetical protein
Rv3769	0	54	11	0.000634267	10	hypothetical protein
Rv3774	echA21	64	6	8.46172e-08	1	enoyl-CoA hydratase
Rv3775	lipE	10	0	0.04071	7	lipase LipE
Rv3803c	fbpD	44	13	0.0364554	1	secreted MPT51/MPB51 antigen protein FbpD
Rv3805c	0	22	4	0.0461318	3	transmembrane protein
Rv3806c	0	24	4	0.0220572	3	phosphoribose diphosphate:decaprenyl-phosphate phosphoribosyltransferase
Rv3808c	glfT	28	6	0.04262	3	bifunctional UDP-galactofuranosyl transferase GLFT
Rv3810	pirG	28	5	0.0149546	3	exported repetitive protein PirG
Rv3841	bfrB	2315	148	0	7	bacterioferritin BfrB
Rv3852	hns	19	2	0.0189411	2	histone-like protein HNS
Rv3854c	ethA	67	22	0.0151228	7	monooxygenase
Rv3865	0	146	26	1.78797e-11	3	hypothetical protein
Rv3869	0	43	10	0.00795604	3	hypothetical protein
Rv3874	esxB	686	58	7.52844e-89	3	protein EsxB
Rv3875	esxA	1454	135	1.73691e-181	3	hypothetical protein
Rv3882c	0	27	6	0.0424643	3	hypothetical protein
Rv3890c	esxC	54	10	0.000310753	3	ESAT-6 like protein ESXC
Rv3905c	esxF	45	7	0.000293563	3	hypothetical protein
Rv3917c	parB	34	9	0.0439389	3	chromosome partitioning protein ParB
Rv3921c	0	63	20	0.0151194	3	inner membrane protein translocase component YidC

## Sheet: Upregulated DNRP1VsDE
Supplementary Table S3 (Cont): RPKM values and functional categories of overexpressed M. tuberculosis genes
Genes	Gene-Name	DE-RPKMs	DNRP1-RPKMs	FDR	Functional category	Function
Rv0047c	0	9	32	1.76003e-05	10	hypothetical protein
Rv0079	0	66	232	2.8891e-37	10	hypothetical protein
Rv0080	0	45	99	2.38995e-10	10	hypothetical protein
Rv0081	0	13	61	5.01579e-12	9	transcriptional regulatory protein
Rv0103c	ctpB	20	57	6.10838e-08	3	cation-transporter P-type ATPase B
Rv0122	0	5	21	0.00057151	10	hypothetical protein
Rv0135c	0	17	27	0.0319867	9	transcriptional regulatory protein
Rv0136	cyp138	11	42	3.15933e-07	7	cytochrome P450 138
Rv0140	0	11	34	2.90453e-05	10	hypothetical protein
Rv0145	0	30	47	0.00335801	1	hypothetical protein
Rv0146	0	6	22	0.000556506	1	hypothetical protein
Rv0188	0	34	55	0.000752624	3	transmembrane protein
Rv0190	0	74	141	4.06992e-12	10	hypothetical protein
Rv0196	0	4	20	0.000265429	9	transcriptional regulatory protein
Rv0211	pckA	30	40	0.0383138	7	phosphoenolpyruvate carboxykinase
Rv0244c	fadE5	13	68	5.77318e-14	1	acyl-CoA dehydrogenase
Rv0249c	0	29	135	4.56387e-26	7	succinate dehydrogenase membrane anchor subunit
Rv0250c	0	17	194	6.41115e-54	10	hypothetical protein
Rv0251c	hsp	17	670	9.24051e-232	0	heat shock protein hsp (heat-stress-induced ribosome-binding protein A)
Rv0275c	0	9	28	0.000282478	9	TetR family transcriptional regulator
Rv0276	0	68	97	4.05295e-05	10	hypothetical protein
Rv0302	0	4	33	2.04785e-08	9	TetR/ACRR family transcriptional regulator
Rv0303	0	8	34	1.67618e-06	7	dehydrogenase/reductase
Rv0324	0	7	27	5.72153e-05	9	ArsR family transcriptional regulator
Rv0327c	cyp135A1	0	15	1.71887e-05	7	cytochrome P450 135A1
Rv0328	0	2	12	0.00529733	9	TetR/AcrR family transcriptional regulator
Rv0331	0	3	67	2.88664e-21	7	dehydrogenase/reductase
Rv0332	0	4	15	0.00600682	10	hypothetical protein
Rv0350	dnaK	91	378	1.62189e-68	0	molecular chaperone DnaK
Rv0351	grpE	53	202	1.71081e-34	0	heat shock protein GrpE
Rv0352	dnaJ1	67	124	3.03153e-10	0	molecular chaperone DnaJ
Rv0367c	0	8	26	0.00029057	10	hypothetical protein
Rv0384c	clpB	25	286	1.394e-79	0	endopeptidase ATP binding protein
Rv0440	groEL	30	183	1.14329e-40	0	molecular chaperone GroEL
Rv0465c	0	3	12	0.0166517	9	transcriptional regulatory protein
Rv0467	icl	8	36	4.63352e-07	7	isocitrate lyase
Rv0468	fadB2	11	20	0.0485628	1	3-hydroxybutyryl-CoA dehydrogenase
Rv0474	0	20	53	8.44823e-07	9	transcriptional regulatory protein
Rv0475	hbhA	76	95	0.000812784	3	iron-regulated heparin binding hemagglutinin hbhA (adhesin)
Rv0485	0	36	46	0.0278928	9	transcriptional regulatory protein
Rv0563	htpX	38	216	1.77674e-46	0	heat shock protein HtpX
Rv0586	0	28	157	1.17018e-33	9	GntR family transcriptional regulator
Rv0587	yrbE2A	8	33	3.22942e-06	0	hypothetical protein
Rv0588	yrbE2B	16	46	1.37515e-06	0	hypothetical protein
Rv0611c	0	20	29	0.0467456	10	hypothetical protein
Rv0628c	0	13	23	0.0334394	10	hypothetical protein
Rv0654	0	7	79	7.43874e-22	7	dioxygenase
Rv0667	rpoB	88	182	2.05605e-17	2	DNA-directed RNA polymerase subunit beta			Control SigH
Rv0672	fadE8	11	35	1.65838e-05	1	acyl-CoA dehydrogenase
Rv0673	echA4	6	17	0.0138427	1	enoyl-CoA hydratase
Rv0677c	mmpS5	14	37	5.71576e-05	3	hypothetical protein
Rv0678	0	38	101	6.76332e-13	10	hypothetical protein
Rv0682	rpsL	21	45	8.12234e-05	2	30S ribosomal protein S12
Rv0687	fabG	16	57	1.70275e-09	7	3-ketoacyl-ACP reductase
Rv0688	0	8	27	0.000167591	7	ferredoxin reductase
Rv0751c	mmsB	4	33	2.04785e-08	7	3-hydroxyisobutyrate dehydrogenase
Rv0752c	fadE9	4	50	3.29817e-14	1	acyl-CoA dehydrogenase
Rv0753c	mmsA	3	59	2.28392e-18	7	methylmalonate-semialdehyde dehydrogenase
Rv0754	PE_PGRS11	1	25	4.64179e-08	6	PE-PGRS family protein
Rv0763c	0	1	7	0.04829	7	ferredoxin
Rv0764c	cyp51	3	20	6.80761e-05	7	cytochrome P450 sterol 14-alpha demethylase
Rv0765c	0	1	17	3.01595e-05	7	short-chain dehydrogenase
Rv0766c	cyp123	1	13	0.00066843	7	cytochrome P450 123
Rv0767c	0	2	23	1.63365e-06	10	hypothetical protein
Rv0768	aldA	2	28	3.22444e-08	7	aldehyde dehydrogenase
Rv0769	0	2	15	0.000660392	7	short-chain dehydrogenase
Rv0790c	0	1	32	1.36551e-10	10	hypothetical protein
Rv0791c	0	3	73	1.998e-23	10	hypothetical protein
Rv0792c	0	6	176	2.5008e-58	9	GntR family transcriptional regulator
Rv0793	0	1	61	2.10419e-21	7	hypothetical protein
Rv0805	0	20	36	0.00423492	7	hypothetical protein
Rv0826	0	1	34	2.45907e-11	10	hypothetical protein
Rv0837c	0	1	11	0.0030198	10	hypothetical protein
Rv0846c	0	2	12	0.00529733	7	oxidase
Rv0847	lpqS	27	124	6.8414e-24	3	lipoprotein LpqS
Rv0848	cysK2	5	27	7.09003e-06	7	cysteine synthase A CysK2
Rv0849	0	4	15	0.00600682	3	integral membrane transport protein
Rv0885	0	31	108	1.97559e-17	10	hypothetical protein
Rv0886	fprB	3	11	0.0296342	7	NADPH:adrenodoxin oxidoreductase FprB
Rv0921	0	23	55	1.51951e-06	5	resolvase
Rv0967	CsoR	55	218	3.49698e-38	9	transcriptional regulatory protein
Rv0968	0	63	451	8.21365e-108	10	hypothetical protein
Rv0969	ctpV	8	179	3.75825e-57	3	metal cation transporter P-type ATPase CtpV
Rv0970	0	6	68	7.34629e-19	3	hypothetical protein
Rv0983	pepD	30	219	1.13597e-52	7	serine protease PepD
Rv0984	moaB2	96	261	8.99488e-34	7	pterin-4-alpha-carbinolamine dehydratase
Rv0990c	0	12	44	1.62857e-07	10	hypothetical protein
Rv0991c	0	61	360	4.58834e-79	10	serine-rich protein
Rv1046c	0	9	29	0.000100229	8	hypothetical protein
Rv1048c	0	2	42	3.35766e-13	10	hypothetical protein
Rv1072	0	272	649	2.17267e-73	3	transmembrane protein
Rv1073	0	31	205	2.9044e-47	10	hypothetical protein
Rv1117	0	13	26	0.010661	10	hypothetical protein
Rv1167c	0	5	28	3.57201e-06	9	transcriptional regulatory protein
Rv1168c	PPE17	22	77	1.46732e-12	6	PPE family protein
Rv1169c	PE11	7	71	4.31876e-19	6	PE family protein
Rv1174c	TB8.4	36	47	0.0212752	3	low molecular weight T-cell antigen
Rv1194c	0	12	28	0.00226383	10	hypothetical protein
Rv1195	PE13	64	110	4.2947e-08	6	PE family protein
Rv1221	sigE	43	315	7.12219e-76	2	RNA polymerase sigma factor SigE			Control SigH
Rv1222	0	71	304	3.87617e-56	2	hypothetical protein
Rv1223	htrA	46	125	3.03855e-16	7	serine protease HtrA
Rv1224	tatB	19	88	6.26668e-17	3	sec-independent translocase
Rv1255c	0	1	10	0.00614044	9	transcriptional regulatory protein
Rv1256c	cyp130	1	9	0.0126509	7	cytochrome P450 130 CYP130
Rv1285	cysD	6	63	3.97827e-17	7	sulfate adenylyltransferase subunit 2
Rv1286	cysN	5	19	0.00172233	7	bifunctional sulfate adenylyltransferase subunit 1/adenylylsulfate kinase
Rv1297	rho	52	163	5.67189e-24	2	transcription termination factor Rho
Rv1299	prfA	36	50	0.00919559	2	peptide chain release factor 1
Rv1344	0	13	23	0.0334394	1	acyl carrier protein
Rv1375	0	3	16	0.00151861	10	hypothetical protein
Rv1391	dfp	30	41	0.0220293	7	bifunctional phosphopantothenoylcysteine decarboxylase/phosphopantothenate synthase
Rv1392	metK	30	40	0.0383138	7	S-adenosylmethionine synthetase
Rv1395	0	4	15	0.00600682	9	transcriptional regulatory protein
Rv1397c	0	15	38	8.34774e-05	0	hypothetical protein				Control SigF
Rv1398c	0	190	305	1.45425e-19	0	hypothetical protein
Rv1405c	0	13	77	5.80735e-17	7	methyltransferase
Rv1460	0	6	28	1.63324e-05	9	transcriptional regulatory protein
Rv1461	0	24	87	2.24594e-14	10	hypothetical protein
Rv1462	0	22	136	2.48929e-30	10	hypothetical protein
Rv1463	0	7	29	1.70247e-05	3	ABC transporter ATP-binding protein
Rv1464	csd	8	36	4.63352e-07	7	cysteine desulfurase
Rv1465	0	10	32	4.9981e-05	7	nitrogen fixation-like protein
Rv1466	0	21	58	9.32865e-08	10	hypothetical protein
Rv1471	trxB1	7	40	8.57882e-09	7	thioredoxin			Control SigH
Rv1472	echA12	25	47	0.000318356	1	enoyl-CoA hydratase
Rv1528c	papA4	21	37	0.00338805	1	polyketide synthase			Control SigH
Rv1533	0	25	70	1.62144e-09	10	hypothetical protein
Rv1535	0	86	114	4.05893e-05	10	hypothetical protein
Rv1586c	0	5	15	0.0151249	5	phiRv1 integrase
Rv1592c	0	14	29	0.00387209	10	hypothetical protein
Rv1621c	cydD	3	11	0.0296342	7	cytochrome assembly ABC transporter ATP-binding protein CydD
Rv1622c	cydB	3	15	0.00284853	7	integral membrane cytochrome D ubiquinol oxidase CydB
Rv1623c	cydA	10	29	0.00025304	7	integral membrane cytochrome D ubiquinol oxidase CydA
Rv1628c	0	8	32	1.06308e-05	10	hypothetical protein
Rv1733c	0	13	79	1.52491e-17	3	transmembrane protein
Rv1736c	narX	33	49	0.00491127	7	nitrate reductase NarX
Rv1767	0	3	12	0.0166517	10	hypothetical protein
Rv1801	PPE29	10	31	8.54977e-05	6	PPE family protein
Rv1806	PE20	4	36	2.03265e-09	6	PE family protein
Rv1807	PPE31	5	65	1.19043e-18	6	PPE family protein
Rv1808	PPE32	13	24	0.0230183	6	PPE family protein
Rv1809	PPE33	4	13	0.0278428	6	PPE family protein
Rv1813c	0	51	169	6.03339e-26	10	hypothetical protein
Rv1831	0	74	98	0.000176447	10	hypothetical protein
Rv1847	0	12	28	0.00226383	10	hypothetical protein
Rv1848	ureA	4	12	0.0455239	7	urease subunit gamma
Rv1854c	ndh	20	30	0.033566	7	NADH dehydrogenase
Rv1870c	0	11	36	9.56018e-06	10	hypothetical protein				Control SigF
Rv1875	0	10	42	8.4001e-08	10	hypothetical protein				Control SigF
Rv1894c	0	22	38	0.00408545	10	hypothetical protein
Rv1895	0	4	33	2.04785e-08	7	dehydrogenase
Rv1904	0	8	17	0.0391378	10	hypothetical protein
Rv1908c	katG	14	32	0.00102487	0	catalase-peroxidase-peroxynitritase T KATG
Rv1909c	furA	6	15	0.0346866	9	ferric uptake regulation protein furA (fur)
Rv1936	0	7	36	2.25206e-07	7	monooxygenase
Rv1937	0	1	9	0.0126509	7	oxygenase
Rv1938	ephB	1	12	0.00142579	0	epoxide hydrolase
Rv1939	0	1	16	6.47238e-05	7	oxidoreductase
Rv1942c	0	3	14	0.0051585	0	hypothetical protein
Rv1955	0	2	26	1.54623e-07	0	hypothetical protein
Rv1956	0	9	35	3.0137e-06	0	transcriptional regulatory protein
Rv1957	0	1	13	0.00066843	10	hypothetical protein
Rv1960c	0	11	22	0.022951	0	hypothetical protein
Rv1985c	0	5	35	2.03558e-08	9	chromosome replication initiation inhibitor protein
Rv1986	0	4	23	3.94774e-05	3	hypothetical protein
Rv1992c	ctpG	8	19	0.016317	3	metal cation transporter P-type ATPase G CtpG
Rv2011c	0	1	36	4.45194e-12	9	hypothetical protein
Rv2012	0	0	14	4.01957e-05	10	hypothetical protein
Rv2016	0	2	17	0.00015376	10	hypothetical protein
Rv2017	0	3	12	0.0166517	9	transcriptional regulatory protein
Rv2021c	0	17	35	0.000981588	9	transcriptional regulatory protein
Rv2022c	0	16	48	4.5063e-07	10	hypothetical protein
Rv2029c	pfkB	9	27	0.000472421	7	phosphofructokinase
Rv2030c	0	39	88	1.6502e-09	10	hypothetical protein
Rv2032	acg	31	90	1.45922e-12	10	hypothetical protein
Rv2034	0	7	21	0.00268861	9	ArsR family transcriptional regulator
Rv2035	0	7	61	1.10394e-15	10	hypothetical protein
Rv2036	0	3	37	1.62424e-10	10	hypothetical protein
Rv2050	0	35	274	1.22913e-67	10	hypothetical protein
Rv2052c	0	8	32	1.06308e-05	10	hypothetical protein
Rv2053c	fxsA	16	120	5.19502e-29	3	FxsA protein
Rv2103c	0	4	13	0.0278428	0	hypothetical protein
Rv2132	0	4	13	0.0278428	10	hypothetical protein
Rv2134c	0	42	52	0.0256838	10	hypothetical protein
Rv2169c	0	42	66	0.000207039	3	transmembrane protein
Rv2202c	cbhK	23	36	0.0133951	7	carbohydrate kinase CbhK
Rv2204c	0	133	323	3.19677e-37	10	hypothetical protein			Control SigH
Rv2243	fabD	24	42	0.00186237	1	ACP S-malonyltransferase
Rv2246	kasB	71	75	0.0466807	1	3-oxoacyl-ACP synthase
Rv2295	0	11	21	0.0336081	10	hypothetical protein
Rv2332	mez	4	12	0.0455239	7	malate dehydrogenase			Control SigH
Rv2372c	0	16	31	0.00412953	10	16S ribosomal RNA methyltransferase RsmE
Rv2373c	dnaJ2	34	88	7.24096e-11	0	molecular chaperone DnaJ
Rv2383c	mbtB	1	7	0.04829	1	phenyloxazoline synthase
Rv2386c	mbtI	1	9	0.0126509	1	salicylate synthase MbtI
Rv2398c	cysW	5	20	0.000983031	3	sulfate ABC transporter
Rv2399c	cysT	6	31	1.33423e-06	3	sulfate ABC transporter
Rv2400c	subI	5	25	2.64982e-05	3	sulfate ABC transporter substrate-binding protein			Control SigH
Rv2450c	rpfE	3	12	0.0166517	3	resuscitation-promoting factor RpfE
Rv2452c	0	2	14	0.0013444	10	hypothetical protein
Rv2454c	0	12	23	0.0190868	7	2-oxoglutarate ferredoxin oxidoreductase subunit beta
Rv2465c	0	12	27	0.00352426	7	ribose-5-phosphate isomerase B
Rv2466c	0	10	61	1.05812e-13	10	hypothetical protein			Control SigH
Rv2495c	pdhC	8	29	5.3987e-05	7	branched-chain alpha-keto acid dehydrogenase subunit E2
Rv2496c	pdhB	42	60	0.00207959	7	pyruvate dehydrogenase E1 subunit beta
Rv2497c	pdhA	28	76	6.90386e-10	7	pyruvate dehydrogenase E1 component alpha subunit PdhA
Rv2498c	citE	10	20	0.0276286	7	citrate (Pro-3S)-lyase beta subunit
Rv2499c	0	2	26	1.54623e-07	7	oxidase regulatory-like protein
Rv2500c	fadE19	53	63	0.0198301	1	acyl-CoA dehydrogenase
Rv2501c	accA1	11	52	3.5093e-10	1	acetyl-coenzyme A carboxylase subunit alpha
Rv2502c	accD1	6	19	0.00315417	1	acetyl-/propionyl-CoA carboxylase subunit beta
Rv2503c	scoB	21	67	4.27338e-10	1	succinyl-CoA:3-ketoacid-CoA transferase subunit beta
Rv2504c	scoA	25	64	5.66539e-08	1	succinyl-CoA:3-ketoacid-CoA transferase subunit alpha
Rv2516c	0	7	74	3.99866e-20	10	hypothetical protein
Rv2517c	0	35	180	8.47663e-37	10	hypothetical protein
Rv2524c	fas	14	39	2.10412e-05	1	fatty acid synthase
Rv2555c	alaS	72	91	0.000794006	2	alanyl-tRNA synthetase			Control SIgH
Rv2617c	0	14	77	1.88831e-16	3	hypothetical protein
Rv2620c	0	7	39	1.71493e-08	3	transmembrane protein
Rv2621c	0	12	42	5.36212e-07	9	transcriptional regulatory protein
Rv2623	TB31.7	84	642	7.38198e-158	0	hypothetical protein
Rv2624c	0	13	47	5.57024e-08	0	hypothetical protein
Rv2625c	0	33	99	4.87756e-14	3	hypothetical protein
Rv2627c	0	23	43	0.000705128	10	hypothetical protein
Rv2629	0	39	115	3.57354e-16	10	hypothetical protein
Rv2630	0	9	29	0.000100229	10	hypothetical protein
Rv2631	0	4	14	0.0166162	10	hypothetical protein
Rv2640c	0	4	13	0.0278428	9	ArsR family transcriptional regulator
Rv2657c	0	3	12	0.0166517	5	phiRv2 prophage protein
Rv2693c	0	12	65	8.67352e-14	3	hypothetical protein
Rv2694c	0	49	363	7.49837e-88	10	hypothetical protein
Rv2699c	0	51	537	1.20459e-146	10	hypothetical protein
Rv2703	sigA	37	45	0.0489107	2	RNA polymerase sigma factor
Rv2707	0	23	108	3.95286e-21	10	hypothetical protein
Rv2710	sigB	105	404	1.66787e-69	2	RNA polymerase sigma factor SigB
Rv2711	ideR	142	206	7.75232e-11	9	IRON-dependent repressor and activator IDER
Rv2742c	0	2	11	0.016724	10	hypothetical protein
Rv2743c	0	16	70	3.20821e-13	3	hypothetical protein
Rv2744c	35kd_ag	96	523	1.56156e-110	10	hypothetical protein
Rv2745c	clgR	248	1378	2.4775e-297	9	transcriptional regulatory protein
Rv2784c	lppU	14	31	0.0015949	3	lipoprotein LppU
Rv2837c	0	23	42	0.00103573	10	hypothetical protein
Rv2839c	infB	33	92	2.10795e-12	2	translation initiation factor IF-2
Rv2868c	ispG	89	98	0.00912397	10	4-hydroxy-3-methylbut-2-en-1-yl diphosphate synthase
Rv2912c	0	2	64	2.87055e-21	9	TetR family transcriptional regulator
Rv2913c	0	6	157	2.91828e-51	7	D-amino acid aminohydrolase
Rv2930	fadD26	17	37	0.000398854	1	acyl-CoA synthetase
Rv2962c	0	6	18	0.00861015	7	glycosyl transferase family protein
Rv2963	0	12	83	1.50478e-19	3	hypothetical protein
Rv3018c	PPE46	4	18	0.000950844	6	PPE family protein
Rv3019c	esxR	5	26	1.37186e-05	3	ESAT-6 like protein
Rv3020c	esxS	2	40	1.73765e-12	3	Esat-6 like protein esxS
Rv3021c	PPE47	3	16	0.00151861	6	PPE family protein			SigH
Rv3022A	PE29	2	63	6.61186e-21	6	PE family protein
Rv3022c	PPE48	3	24	3.74882e-06	6	PPE family protein
Rv3049c	0	15	30	0.00492003	7	monooxygenase			Control SigH
Rv3052c	nrdI	89	149	1.82277e-10	2	ribonucleotide reductase stimulatory protein
Rv3053c	nrdH	64	116	2.77015e-09	2	glutaredoxin electron transport protein NrdH
Rv3054c	0	11	219	1.14474e-68	10	hypothetical protein
Rv3060c	0	5	25	2.64982e-05	9	GntR family transcriptional regulator
Rv3061c	fadE22	6	26	5.14589e-05	1	acyl-CoA dehydrogenase
Rv3081	0	4	18	0.000950844	10	hypothetical protein
Rv3098c	0	13	53	1.45846e-09	10	hypothetical protein			Control SigH
Rv3134c	0	72	84	0.00746401	0	hypothetical protein
Rv3160c	0	1	12	0.00142579	9	TetR family transcriptional regulator
Rv3161c	0	6	31	1.33423e-06	7	dioxygenase
Rv3168	0	2	11	0.016724	0	hypothetical protein
Rv3176c	mesT	2	10	0.0295081	0	epoxide hydrolase
Rv3205c	0	57	89	1.02996e-05	10	hypothetical protein
Rv3206c	moeB1	30	92	1.84584e-13	7	molybdopterin biosynthesis-like protein MoeZ			Control SigH
Rv3221A	0	66	140	6.55879e-14	2	anti-sigma factor
Rv3222c	0	43	125	2.87217e-17	10	hypothetical protein
Rv3223c	sigH	41	133	4.36957e-20	2	RNA polymerase sigma factor RpoE			Control SigH
Rv3229c	0	20	29	0.0467456	1	linoleoyl-CoA desaturase
Rv3230c	0	19	39	0.000447705	7	oxidoreductase
Rv3248c	sahH	31	58	4.50323e-05	7	S-adenosyl-L-homocysteine hydrolase
Rv3249c	0	7	61	1.10394e-15	9	TetR family transcriptional regulator
Rv3250c	rubB	59	411	4.90165e-97	7	rubredoxin RubB
Rv3251c	rubA	22	216	1.62778e-57	7	rubredoxin RUBA
Rv3252c	alkB	10	169	2.25004e-51	1	transmembrane alkane 1-monooxygenase AlkB
Rv3270	ctpC	36	133	2.6674e-22	3	metal cation-transporting P-type ATPase C CtpC
Rv3286c	sigF	5	14	0.0253367	2	RNA polymerase sigma factor SigF				Control SigF
Rv3288c	usfY	59	187	8.2185e-28	10	hypothetical protein
Rv3289c	0	18	298	2.29987e-90	3	transmembrane protein
Rv3290c	lat	23	271	5.21357e-76	7	L-lysine aminotransferase
Rv3334	0	9	26	0.000780895	9	MerR family transcriptional regulator
Rv3406	0	1	40	1.51636e-13	7	dioxygenase
Rv3416	whiB3	6	18	0.00861015	9	transcriptional regulatory protein WHIB-like WHIB3
Rv3417c	groEL	11	69	1.12823e-15	0	molecular chaperone GroEL
Rv3418c	groES	105	180	4.60258e-13	0	co-chaperonin GroES
Rv3460c	rpsM	66	84	0.00143666	2	30S ribosomal protein S13
Rv3461c	rpmJ	108	117	0.00493599	2	50S ribosomal protein L36
Rv3463	0	2	22	3.56545e-06	10	hypothetical protein
Rv3513c	fadD18	4	17	0.00177707	1	fatty-acid--CoA ligase
Rv3515c	fadD19	2	19	3.53306e-05	1	acyl-CoA synthetase
Rv3526	0	31	91	8.33981e-13	7	oxidoreductase
Rv3527	0	2	11	0.016724	10	hypothetical protein
Rv3529c	0	2	10	0.0295081	10	hypothetical protein
Rv3530c	0	1	8	0.0249912	7	short-chain dehydrogenase
Rv3531c	0	3	16	0.00151861	10	hypothetical protein
Rv3534c	0	8	19	0.016317	7	4-hydroxy-2-ketovalerate aldolase
Rv3535c	0	15	36	0.000214506	7	acetaldehyde dehydrogenase
Rv3536c	0	13	31	0.000753747	7	hydratase
Rv3545c	cyp125	11	20	0.0485628	7	cytochrome P450 125
Rv3546	fadA5	8	19	0.016317	1	acetyl-CoA acetyltransferase
Rv3549c	0	13	30	0.00120927	7	short-chain dehydrogenase
Rv3569c	bphD	6	32	6.64608e-07	7	2-hydroxy-6-oxo-6-phenylhexa-2,4-dienoate hydrolase
Rv3570c	0	10	47	2.32039e-09	7	oxidoreductase
Rv3571	hmp	4	32	4.2789e-08	7	hemoglobine-like protein
Rv3574	0	5	18	0.00303989	9	TetR family transcriptional regulator
Rv3581c	ispF	74	98	0.000176447	7	2-C-methyl-D-erythritol 2,4-cyclodiphosphate synthase
Rv3636	0	19	31	0.0152154	5	transposase
Rv3679	0	62	125	1.13257e-11	3	anion transporter ATPase
Rv3746c	PE34	4	34	9.57495e-09	6	PE family protein
Rv3771c	0	3	14	0.0051585	10	hypothetical protein
Rv3830c	0	1	13	0.00066843	9	TetR family transcriptional regulator
Rv3833	0	0	7	0.0122353	9	AraC family transcriptional regulator
Rv3837c	0	19	97	8.71038e-20	7	phosphoglycerate mutase
Rv3862c	whiB6	17	149	3.10378e-38	9	transcriptional regulatory protein WHIB-like WHIB6
Rv3872	PE35	75	105	2.49693e-05	6	PE family-like protein			transcriptional regulatory protein WHIB-like WHIB6
Rv3873	PPE68	40	50	0.0288836	6	PPE family protein
Rv3913	trxB2	11	32	0.00014237	7	thioredoxin reductase			Control SigH
Rv3923c	rnpA	40	54	0.00753903	2	ribonuclease P

## Sheet: Upregulated DE vs DNRP2
Supplementary Table S3 (Cont): RPKM values and functional categories of overexpressed M. tuberculosis genes
Gene	Gene-name	DE-RPKMs	DNRP2-RPKMs	FDR	Functional category	Description
Rv0079	0	232	5	1.08895e-05	10	hypothetical protein
Rv0080	0	99	1	0.00619421	10	hypothetical protein
Rv0188	0	55	27	2.19294e-05	3	transmembrane protein
Rv0249c	0	135	3	0.00469217	7	succinate dehydrogenase membrane anchor subunit
Rv0251c	hsp	670	151	9.30272e-07	0	heat shock protein hsp (heat-stress-induced ribosome-binding protein A)
Rv0350	dnaK	378	11	6.45654e-08	0	molecular chaperone DnaK
Rv0351	grpE	202	8	0.00640807	0	heat shock protein GrpE
Rv0384c	clpB	286	14	0.00331253	0	endopeptidase ATP binding protein
Rv0475	hbhA	95	2	0.0449504	3	iron-regulated heparin binding hemagglutinin hbhA (adhesin)
Rv0563	htpX	216	7	0.000555655	0	heat shock protein HtpX
Rv0569	0	61	0	0.0384668	10	hypothetical protein
Rv0586	0	157	1	1.26146e-05	9	GntR family transcriptional regulator
Rv0628c	0	23	11	0.042434	10	hypothetical protein
Rv0700	rpsJ	80	0	0.00648993	2	30S ribosomal protein S10
Rv0824c	desA1	109	2	0.0123191	1	acyl-ACP desaturase
Rv0834c	PE_PGRS14	20	11	0.0190717	6	PE-PGRS family protein
Rv0885	0	108	2	0.0122586	10	hypothetical protein
Rv0983	pepD	219	67	1.52759e-06	7	serine protease PepD
Rv0984	moaB2	261	72	1.47642e-05	7	pterin-4-alpha-carbinolamine dehydratase
Rv0990c	0	44	25	8.60935e-06	10	hypothetical protein
Rv1072	0	649	9	1.9998e-21	3	transmembrane protein
Rv1073	0	205	1	6.58659e-08	10	hypothetical protein
Rv1195	PE13	110	0	0.000223928	6	PE family protein
Rv1196	PPE18	144	1	5.32958e-05	6	PPE family protein
Rv1197	esxK	90	1	0.0168661	3	Esat-6 like protein esxK (Esat-6 like protein 3)
Rv1198	esxL	144	0	4.86822e-06	3	ESAT-6 like protein ESXL (ESAT-6 like protein 4)
Rv1221	sigE	315	151	2.25706e-30	2	RNA polymerase sigma factor SigE
Rv1222	rseA	304	226	7.57939e-71	2	Information pathway
Rv1223	htrA	125	81	4.6007e-22	7	serine protease HtrA
Rv1297	rho	163	46	0.00110593	2	transcription termination factor Rho
Rv1298	rpmE	250	74	9.31809e-07	2	50S ribosomal protein L31
Rv1331	clpS	72	0	0.0126766	10	ATP-dependent Clp protease adaptor protein ClpS
Rv1395	0	15	13	0.000330093	9	transcriptional regulatory protein
Rv1535	0	114	1	0.00154809	10	hypothetical protein
Rv1733c	0	79	1	0.0456524	3	transmembrane protein
Rv1738	0	158	2	0.000101904	10	hypothetical protein
Rv1801	PPE29	31	25	7.06578e-08	6	PPE family protein
Rv1802	PPE30	6	8	0.00292732	6	PPE family protein
Rv1808	PPE32	24	23	3.81955e-08	6	PPE family protein
Rv1809	PPE33	13	10	0.00607551	6	PPE family protein
Rv1811	mgtC	18	11	0.0111219	3	Mg2+ transport P-type ATPase C
Rv1813c	0	169	2	3.49857e-05	10	hypothetical protein
Rv1871c	0	89	0	0.00215013	10	hypothetical protein
Rv1872c	lldD2	122	1	0.000504275	7	L-lactate dehydrogenase (cytochrome) LldD2
Rv1875	0	42	20	0.000850782	10	hypothetical protein
Rv1877	0	6	6	0.044882	3	hypothetical protein
Rv1936	0	36	26	1.57401e-07	7	monooxygenase
Rv1937	0	9	7	0.04515	7	oxygenase
Rv1985c	0	35	18	0.00100231	9	chromosome replication initiation inhibitor protein
Rv1990A	0	12	8	0.0422736	7	dehydrogenase
Rv1993c	0	32	18	0.000440189	10	hypothetical protein
Rv2007c	fdxA	162	3	0.000489361	7	ferredoxin FDXA
Rv2030c	0	88	1	0.0161375	10	hypothetical protein
Rv2031c	hspX	124	1	0.000517477	0	heat shock protein hspX
Rv2032	acg	90	1	0.0168661	10	hypothetical protein
Rv2035	0	61	0	0.0384668	10	hypothetical protein
Rv2050	0	274	8	1.46485e-05	10	hypothetical protein
Rv2053c	fxsA	120	3	0.0154756	3	FxsA protein
Rv2137c	0	110	1	0.00216515	10	hypothetical protein
Rv2244	acpP	340	3	2.39556e-12	1	acyl carrier protein
Rv2245	kasA	228	2	7.44507e-08	1	3-oxoacyl-ACP synthase
Rv2332	mez	12	9	0.0130992	7	malate dehydrogenase
Rv2352c	PPE38	22	12	0.0123693	6	PPE family protein
Rv2517c	0	180	6	0.00424831	10	hypothetical protein
Rv2623	TB31.7	642	21	1.0033e-12	0	hypothetical protein
Rv2625c	0	99	1	0.00619421	3	hypothetical protein
Rv2626c	0	80	0	0.00648993	10	hypothetical protein
Rv2629	0	115	2	0.00644796	10	hypothetical protein
Rv2641	cadI	42	42	1.03707e-15	10	cadmium inducible protein CADI
Rv2643	arsC	14	9	0.0267006	3	arsenic-transport integral membrane protein ArsC
Rv2699c	0	537	8	5.64575e-17	10	hypothetical protein
Rv2707	0	108	80	1.83385e-24	10	hypothetical protein
Rv2711	ideR	206	47	0.0410046	9	IRON-dependent repressor and activator IDER
Rv2731	0	9	8	0.0130389	10	hypothetical protein
Rv2744c	35kd_ag	523	21	3.30738e-08	10	hypothetical protein
Rv2745c	clgR	1378	50	9.65267e-26	9	transcriptional regulatory protein
Rv2785c	rpsO	77	1	0.0450244	2	30S ribosomal protein S15
Rv2913c	0	157	1	1.26146e-05	7	D-amino acid aminohydrolase
Rv3018c	PPE46	18	12	0.00373896	6	PPE family protein
Rv3021c	PPE47	16	11	0.00591289	6	PPE family protein
Rv3052c	nrdI	149	5	0.0154544	2	ribonucleotide reductase stimulatory protein
Rv3054c	0	219	10	0.0118462	10	hypothetical protein
Rv3134c	0	84	1	0.0230453	0	hypothetical protein
Rv3206c	moeB1	92	58	2.64968e-15	7	molybdopterin biosynthesis-like protein MoeZ
Rv3219	whiB1	393	8	1.59185e-10	9	transcriptional regulatory protein WHIB-like WHIB1
Rv3220c	0	17	16	1.46484e-05	9	two component sensor kinase
Rv3221A	0	140	59	7.42598e-10	2	anti-sigma factor
Rv3221c	TB7.3	84	66	4.48515e-21	1	acetyl-CoA carboxylase biotin carboxyl carrier protein subunit
Rv3222c	0	125	93	1.33287e-28	10	hypothetical protein
Rv3223c	sigH	133	39	0.00215423	2	RNA polymerase sigma factor RpoE
Rv3249c	0	61	0	0.0384668	9	TetR family transcriptional regulator
Rv3250c	rubB	411	4	7.67226e-15	7	rubredoxin RubB
Rv3251c	rubA	216	0	7.62878e-10	7	rubredoxin RUBA
Rv3252c	alkB	169	2	3.49857e-05	1	transmembrane alkane 1-monooxygenase AlkB
Rv3269	0	272	8	1.44603e-05	0	hypothetical protein
Rv3385c	0	35	17	0.00274661	0	hypothetical protein
Rv3407	0	140	5	0.0380959	0	hypothetical protein
Rv3460c	rpsM	84	1	0.0230453	2	30S ribosomal protein S13
Rv3526	0	91	1	0.0118133	7	oxidoreductase
Rv3583c	0	206	11	0.0487598	9	transcription factor
Rv3597c	lsr2	44	22	0.000196787	2	iron-regulated LSR2 protein precursor
Rv3615c	0	79	1	0.0456524	3	hypothetical protein
Rv3616c	0	100	1	0.00618451	3	hypothetical protein
Rv3679	0	125	3	0.0118411	3	anion transporter ATPase
Rv3872	PE35	105	29	0.0386339	6	PE family-like protein
Rv3875	esxA	135	51	3.16061e-07	3	hypothetical protein
Rv3920c	0	87	1	0.0244484	10	hypothetical protein

## Sheet: Upregulated DNRP2 vs DE
Supplementary Table S3 (Cont): RPKM values and functional categories of overexpressed M. tuberculosis genes
Gene	Gene-name	DE-RPKMs	DNRP2-RPKMs	FDR	Functional category	Description
Rv0142	0	12	13	6.82497e-05	10	hypothetical protein
Rv0989c	grcC2	9	10	0.000950932	7	polyprenyl synthetase
Rv1224	tatB	88	106	3.37271e-45	3	sec-independent translocase
Rv1228	lpqX	6	14	1.75479e-07	3	lipoprotein LpqX
Rv1259	0	6	21	5.81675e-13	2	hypothetical protein
Rv1260	0	4	13	1.23289e-07	7	hypothetical protein
Rv1265	0	29	39	3.04573e-17	10	hypothetical protein
Rv1510	0	5	7	0.00644566	3	hypothetical protein
Rv1801	PPE29	31	25	7.06578e-08	6	PPE family protein
Rv1806	PE20	36	42	3.0053e-17	6	PE family protein
Rv1807	PPE31	65	66	3.40159e-25	6	PPE family protein
Rv1831	0	98	385	2.89327e-262	10	hypothetical protein
Rv2549c	0	6	19	2.35105e-11	0	hypothetical protein
Rv2550c	0	22	30	2.9873e-13	0	hypothetical protein
Rv2551c	0	8	60	1.00416e-44	10	hypothetical protein
Rv2552c	aroE	14	65	1.43433e-44	7	shikimate 5-dehydrogenase
Rv2553c	0	17	48	1.14719e-28	3	hypothetical protein
Rv2554c	0	17	107	2.13644e-78	10	Holliday junction resolvase-like protein
Rv2555c	alaS	91	369	2.53049e-253	2	alanyl-tRNA synthetase
Rv2615c	PE_PGRS45	5	8	0.00150312	6	PE-PGRS family protein
Rv2642	0	17	17	3.90428e-06	9	ArsR family transcriptional regulator
Rv2676c	0	7	8	0.00532117	10	hypothetical protein
Rv2709	0	10	21	4.74072e-11	3	transmembrane protein
Rv3014c	ligA	2	7	0.000546102	2	NAD-dependent DNA ligase LigA
Rv3015c	0	2	11	3.38621e-07	10	hypothetical protein
Rv3017c	esxQ	7	27	3.17297e-17	3	Esat-6 like protein esxQ (TB12.9) (Esat-6 like protein 8)
Rv3201c	0	3	6	0.00714408	2	ATP-dependent DNA helicase
Rv3202c	0	3	12	2.13026e-07	2	ATP-dependent DNA helicase
Rv3205c	0	89	119	8.36772e-54	10	hypothetical protein
Rv3471c	0	2	9	1.46961e-05	10	hypothetical protein
Rv3473c	bpoA	1	5	0.0060431	0	peroxidase

## Sheet: Upregulated FE vs FANRP1
Supplementary Table S3 (Cont): RPKM values and functional categories of overexpressed M. tuberculosis genes
Gene	Gene-name	FE-RPKMs	FANRP1-RPKMs	FDR	Functional category	Description
Rv0079	0	103	64	0.0105967	10	hypothetical protein
Rv0145	0	42	15	0.0036609	1	hypothetical protein
Rv0190	0	90	31	2.44369e-07	10	hypothetical protein
Rv0341	iniB	86	39	0.000139895	3	isoniazid inductible gene protein INIB
Rv0509	hemA	86	47	0.00372946	7	glutamyl-tRNA reductase
Rv0510	hemC	92	51	0.00342069	7	porphobilinogen deaminase
Rv0569	0	247	88	2.02848e-20	10	hypothetical protein
Rv0692	0	127	53	5.28281e-08	10	hypothetical protein
Rv0693	pqqE	116	16	4.48052e-20	7	coenzyme PQQ synthesis protein E
Rv0696	0	24	7	0.0437071	7	membrane sugar transferase
Rv0709	rpmC	109	50	8.4106e-06	2	50S ribosomal protein L29
Rv0808	purF	39	16	0.0310196	7	amidophosphoribosyltransferase
Rv0866	moaE2	35	11	0.0053936	7	molybdenum cofactor biosynthesis protein E2
Rv1094	desA2	123	51	7.11885e-08	1	acyl-ACP desaturase
Rv1110	ispH	52	27	0.0473953	3	4-hydroxy-3-methylbut-2-enyl diphosphate reductase
Rv1133c	metE	58	31	0.0440492	7	5- methyltetrahydropteroyltriglutamate/homocysteine S-methyltransferase
Rv1310	atpD	63	35	0.0391964	7	ATP synthase F0F1 subunit beta
Rv1311	atpC	155	48	7.87726e-15	7	ATP synthase F0F1 subunit epsilon
Rv1322A	0	47	19	0.00635601	10	hypothetical protein
Rv1398c	0	317	225	1.52378e-05	0	hypothetical protein
Rv1462	0	24	7	0.0437071	10	hypothetical protein
Rv1738	0	408	82	2.30377e-58	10	hypothetical protein
Rv1813c	0	179	25	3.39033e-31	10	hypothetical protein
Rv1872c	lldD2	174	127	0.0120075	7	L-lactate dehydrogenase (cytochrome) LldD2
Rv1932	tpx	27	4	0.000452617	0	thiol peroxidase
Rv1947	0	30	7	0.00284719	10	hypothetical protein
Rv1996	0	86	19	8.95598e-11	0	hypothetical protein
Rv2031c	hspX	257	158	2.51539e-07	0	heat shock protein hspX
Rv2160A	0	137	63	2.51067e-07	9	hypothetical protein, possibly a TetR-family transcriptional regulator
Rv2342	0	34	11	0.0082812	10	hypothetical protein
Rv2391	nirA	35	7	0.000247744	7	ferredoxin-dependent nitrite reductase NIRA
Rv2392	cysH	24	4	0.0024173	7	phosphoadenosine phosphosulfate reductase
Rv2393	0	38	4	8.63385e-07	7	hypothetical protein
Rv2557	0	74	32	0.00029357	10	hypothetical protein
Rv3127	0	45	8	2.33896e-06	10	hypothetical protein
Rv3130c	tgs1	157	24	5.42528e-26	1	triacylglycerol synthase
Rv3131	0	297	40	1.38247e-53	10	hypothetical protein
Rv3229c	0	75	8	2.91805e-14	1	linoleoyl-CoA desaturase
Rv3230c	0	25	7	0.0284221	7	oxidoreductase
Rv3288c	usfY	83	31	6.19569e-06	10	hypothetical protein
Rv3289c	0	106	20	4.05664e-15	3	transmembrane protein
Rv3290c	lat	72	18	4.20119e-08	7	L-lysine aminotransferase
Rv3407	0	236	185	0.0157569	0	hypothetical protein
Rv3408	0	71	39	0.0148562	0	hypothetical protein
Rv3478	PPE60	158	118	0.0434273	6	PE family protein
Rv3582c	ispD	244	82	1.33315e-21	7	2-C-methyl-D-erythritol 4-phosphate cytidylyltransferase
Rv3583c	0	426	182	1.2587e-27	9	transcription factor
Rv3614c	0	133	95	0.0434855	3	hypothetical protein
Rv3648c	cspA	474	205	2.98288e-30	0	cold shock protein A
Rv3841	bfrB	291	43	3.65693e-50	7	bacterioferritin BfrB

## Sheet: Upregulated FNRP1 vs FE
Supplementary Table S3 (Cont): RPKM values and functional categories of overexpressed M. tuberculosis genes
Gene	Gene-name	FE-RPKMs	FANRP1-RPKMs	FDR	Functional category	Description
Rv0103c	ctpB	8	36	0.0064943	3	cation-transporter P-type ATPase B
Rv0129c	fbpC	9	35	0.0208376	1	secreted antigen 85-C FbpC
Rv0251c	hsp	4	35	0.000119372	0	heat shock protein hsp (heat-stress-induced ribosome-binding protein A)
Rv0282	0	46	112	0.000389296	3	hypothetical protein
Rv0350	dnaK	9	34	0.0310854	0	molecular chaperone DnaK
Rv0440	groEL2	11	195	2.50576e-37	0	molecular chaperone GroEL
Rv0500B	0	20	58	0.00872665	10	hypothetical protein
Rv0635	0	16	62	0.000175793	7	(3R)-hydroxyacyl-ACP dehydratase subunit HadA
Rv0636	0	27	96	1.54911e-06	7	(3R)-hydroxyacyl-ACP dehydratase subunit HadB
Rv0700	rpsJ	63	193	3.37402e-11	2	30S ribosomal protein S10
Rv0983	pepD	12	45	0.0053793	7	serine protease PepD
Rv0991c	0	3	29	0.000639565	10	serine-rich protein
Rv1080c	greA	18	51	0.0219999	2	transcription elongation factor GreA
Rv1130	0	2	32	2.8911e-05	7	hypothetical protein
Rv1221	sigE	8	47	5.0005e-05	2	RNA polymerase sigma factor SigE
Rv1274	lprB	47	118	0.000142476	3	lipoprotein LprB
Rv1386	PE15	17	68	3.25592e-05	6	PE family protein
Rv1535	0	47	122	4.17061e-05	10	hypothetical protein
Rv1807	PPE31	1	25	0.000265983	6	PPE family protein
Rv1831	0	23	70	0.0011694	10	hypothetical protein
Rv1950c	0	2	37	1.81995e-06	10	hypothetical protein
Rv2050	0	12	46	0.0037116	10	hypothetical protein
Rv2137c	0	104	267	1.80604e-11	10	hypothetical protein
Rv2144c	0	59	123	0.00484297	3	transmembrane protein
Rv2169c	0	14	52	0.00143456	3	transmembrane protein
Rv2244	acpM	50	116	0.000873618	1	Biosynthesis of fatty acids; involved in meromycolate extension
Rv2421c	nadD	9	81	1.75127e-11	7	nicotinic acid mononucleotide adenylyltransferase
Rv2441c	rpmA	44	118	2.62999e-05	2	50S ribosomal protein L27
Rv2442c	rplU	35	112	1.01565e-06	2	50S ribosomal protein L21
Rv2584c	apt	46	115	0.000162881	7	adenine phosphoribosyltransferase
Rv2632c	0	15	68	7.09217e-06	10	hypothetical protein
Rv2633c	0	6	34	0.00182773	10	hypothetical protein
Rv2694c	0	10	56	9.60505e-06	10	hypothetical protein
Rv2696c	0	21	57	0.0202184	10	hypothetical protein
Rv2699c	0	25	84	2.58386e-05	10	hypothetical protein
Rv2710	sigB	43	103	0.00146764	2	RNA polymerase sigma factor SigB
Rv2744c	35kd_ag	26	70	0.00542376	10	hypothetical protein
Rv2745c	clgR	113	197	0.0095129	9	transcriptional regulatory protein
Rv2785c	rpsO	21	93	4.0693e-08	2	30S ribosomal protein S15
Rv2904c	rplS	40	89	0.0149791	2	50S ribosomal protein L19
Rv2959c	0	3	32	0.000141188	7	methyltransferase
Rv3417c	groEL	4	38	2.66024e-05	0	molecular chaperone GroEL
Rv3418c	groES	20	308	2.36143e-57	0	co-chaperonin GroES
Rv3461c	rpmJ	41	101	0.000831861	2	50S ribosomal protein L36
Rv3462c	infA	85	171	0.000631382	2	translation initiation factor IF-1
Rv3679	0	28	120	2.37961e-10	3	anion transporter ATPase
Rv3686c	0	51	108	0.00771279	10	hypothetical protein
Rv3706c	0	1	20	0.00246457	10	hypothetical protein
Rv3765c	0	6	85	8.91356e-15	9	two component transcriptional regulator
Rv3778c	0	10	37	0.0193972	7	aminotransferase
Rv3872	PE35	20	85	4.87674e-07	6	PE family-like protein
Rv3875	esxA	192	408	1.47197e-11	3	hypothetical protein
Rv3924c	rpmH	12	47	0.00248842	2	50S ribosomal protein L34

## Sheet: Upregulated FE vs FNRP2
Supplementary Table S3 (Cont): RPKM values and functional categories of overexpressed M. tuberculosis genes
Gene	Gene-name	FE-RPKMs	FANRP2-RPKMs	FDR	Functional category	Description
Rv0079		103	73	4.26231e-27	10	hypothetical protein
Rv0080		30	16	3.16547e-05	10	hypothetical protein
Rv0289		59	22	5.60362e-07	3	hypothetical protein
Rv0615		5	9	0.0335999	3	hypothetical protein
Rv0628c		6	32	4.19213e-06	10	hypothetical protein
Rv0990c		0	0	0.0154851	10	hypothetical protein
Rv1177	fdxC	98	52	5.98329e-14	7	ferredoxin FdxC
Rv1222		26	21	5.06829e-16	2	hypothetical protein
Rv1223	htrA	12	6	5.24012e-06	7	serine protease HtrA
Rv1224	tatB	8	3	8.27464e-12	3	sec-independent translocase
Rv1297	rho	36	2	0.000499886	2	transcription termination factor Rho
Rv1298	rpmE	98	2	6.05975e-08	2	50S ribosomal protein L31
Rv1738		408	21	1.53459e-06	10	hypothetical protein
Rv1831		23	14	7.51721e-45	10	hypothetical protein
Rv2007c	fdxA	148	12	0.026045	7	ferredoxin FDXA
Rv2161c		72	27	3.31151e-05	7	hypothetical protein
Rv2358		6	9	0.0335999	9	ArsR family transcriptional regulator
Rv2550c		14	1	0.0189042	0	hypothetical protein
Rv2551c		6	0	5.38367e-08	10	hypothetical protein
Rv2552c	aroE	6	1	8.71436e-08	7	shikimate 5-dehydrogenase
Rv2553c		4	1	4.18806e-05	3	hypothetical protein
Rv2555c	alaS	30	4	1.3239e-53	2	alanyl-tRNA synthetase
Rv2558		45	33	1.85588e-06	10	hypothetical protein
Rv2707		5	1	5.81043e-10	10	hypothetical protein
Rv2710	sigB	43	8	0.0040166	2	RNA polymerase sigma factor SigB
Rv2745c		113	75	6.62819e-08	9	transcriptional regulatory protein
Rv2785c	rpsO	21	9	0.0335999	2	30S ribosomal protein S15
Rv2791c		30	20	5.23362e-08	5	transposase
Rv2868c	ispG	33	29	2.11637e-08	10	4-hydroxy-3-methylbut-2-en-1-yl diphosphate synthase
Rv2926c		55	35	1.27385e-09	10	hypothetical protein
Rv3017c	esxQ	2	0	0.00543241	3	Esat-6 like protein esxQ (TB12.9) (Esat-6 like protein 8)
Rv3205c		20	4	6.44609e-13	10	hypothetical protein
Rv3206c	moeB1	10	2	9.05113e-06	7	molybdopterin biosynthesis-like protein MoeZ
Rv3219	whiB1	239	23	0.000336224	9	transcriptional regulatory protein WHIB-like WHIB1
Rv3221A		36	2	9.36836e-06	2	anti-sigma factor
Rv3221c	TB7.3	43	1	6.15632e-08	1	acetyl-CoA carboxylase biotin carboxyl carrier protein subunit
Rv3222c		13	5	2.40804e-08	10	hypothetical protein
Rv3250c	rubB	58	14	0.013941	7	rubredoxin RubB
Rv3269		37	26	3.06994e-05	0	hypothetical protein
Rv3290c	lat	72	48	2.73876e-05	7	L-lysine aminotransferase
Rv3461c	rpmJ	41	13	0.0299987	2	50S ribosomal protein L36
Rv3582c	ispD	244	15	0.0154521	7	2-C-methyl-D-erythritol 4-phosphate cytidylyltransferase
Rv3583c		426	23	0.00405899	9	transcription factor
Rv3862c	whiB6	0	0	0.000735773	9	transcriptional regulatory protein WHIB-like WHIB6

## Sheet: Upregulated FNRP2 Vs FE
Supplementary Table S3 (Cont): RPKM values and functional categories of overexpressed M. tuberculosis genes
Gene	Gene-name	FE-RPKMs	FANRP2-RPKMs	FDR	Functional category	Description
Rv0251c	hsp	4	27	4.46034e-05	0	heat shock protein hsp (heat-stress-induced ribosome-binding protein A)
Rv0968	0	43	81	2.0711e-13	10	hypothetical protein
Rv0969	ctpV	8	60	4.95037e-11	3	metal cation transporter P-type ATPase CtpV
Rv1152	0	3	37	8.2367e-10	9	transcriptional regulatory protein
Rv1221	sigE	8	12	1.94931e-11	2	RNA polymerase sigma factor SigE
Rv1801	PPE29	0	0	0.0154851	6	PPE family protein
Rv1806	PE20	0	1	0.000274402	6	PE family protein
Rv1807	PPE31	1	4	2.33345e-05	6	PPE family protein
Rv2554c	0	7	16	0.000233588	10	Holliday junction resolvase-like protein
Rv2623	TB31.7	74	115	1.72542e-33	0	hypothetical protein
Rv2641	cadI	3	4	0.0427494	10	cadmium inducible protein CADI

## Sheet: Upregulated DNRP1 vs DNRP2
Supplementary Table S3 (Cont): RPKM values and functional categories of overexpressed M. tuberculosis genes
Gene	Gene-name	DNRP1-RPKMs	DNRP2-RPKMs	FDR	Functional Categories	Description
Rv0079	0	232	5	1.08895e-05	10	hypothetical protein
Rv0080	0	99	1	0.00619421	10	hypothetical protein
Rv0188	0	55	27	2.19294e-05	3	transmembrane protein
Rv0249c	0	135	3	0.00469217	7	succinate dehydrogenase membrane anchor subunit
Rv0251c	hsp	670	151	9.30272e-07	0	heat shock protein hsp (heat-stress-induced ribosome-binding protein A)
Rv0350	dnaK	378	11	6.45654e-08	0	molecular chaperone DnaK
Rv0351	grpE	202	8	0.00640807	0	heat shock protein GrpE
Rv0384c	clpB	286	14	0.00331253	0	endopeptidase ATP binding protein
Rv0475	hbhA	95	2	0.0449504	3	iron-regulated heparin binding hemagglutinin hbhA (adhesin)
Rv0563	htpX	216	7	0.000555655	0	heat shock protein HtpX
Rv0569	0	61	0	0.0384668	10	hypothetical protein
Rv0586	0	157	1	1.26146e-05	9	GntR family transcriptional regulator
Rv0628c	0	23	11	0.042434	10	hypothetical protein
Rv0700	rpsJ	80	0	0.00648993	2	30S ribosomal protein S10
Rv0824c	desA1	109	2	0.0123191	1	acyl-ACP desaturase
Rv0834c	PE_PGRS14	20	11	0.0190717	6	PE-PGRS family protein
Rv0885	0	108	2	0.0122586	10	hypothetical protein
Rv0983	pepD	219	67	1.52759e-06	7	serine protease PepD
Rv0984	moaB2	261	72	1.47642e-05	7	pterin-4-alpha-carbinolamine dehydratase
Rv0990c	0	44	25	8.60935e-06	10	hypothetical protein
Rv1072	0	649	9	1.9998e-21	3	transmembrane protein
Rv1073	0	205	1	6.58659e-08	10	hypothetical protein
Rv1195	PE13	110	0	0.000223928	6	PE family protein
Rv1196	PPE18	144	1	5.32958e-05	6	PPE family protein
Rv1197	esxK	90	1	0.0168661	3	Esat-6 like protein esxK (Esat-6 like protein 3)
Rv1198	esxL	144	0	4.86822e-06	3	ESAT-6 like protein ESXL (ESAT-6 like protein 4)
Rv1221	sigE	315	151	2.25706e-30	2	RNA polymerase sigma factor SigE
Rv1222	0	304	226	7.57939e-71	2	hypothetical protein
Rv1223	htrA	125	81	4.6007e-22	7	serine protease HtrA
Rv1297	rho	163	46	0.00110593	2	transcription termination factor Rho
Rv1298	rpmE	250	74	9.31809e-07	2	50S ribosomal protein L31
Rv1331		72	0	0.0126766	10	Hypothetical protein
Rv1395	0	15	13	0.000330093	9	transcriptional regulatory protein
Rv1535	0	114	1	0.00154809	10	hypothetical protein
Rv1733c	0	79	1	0.0456524	3	transmembrane protein
Rv1738	0	158	2	0.000101904	10	hypothetical protein
Rv1808	PPE32	24	23	3.81955e-08	6	PPE family protein
Rv1809	PPE33	13	10	0.00607551	6	PPE family protein
Rv1811	mgtC	18	11	0.0111219	3	Mg2+ transport P-type ATPase C
Rv1813c	0	169	2	3.49857e-05	10	hypothetical protein
Rv1871c	0	89	0	0.00215013	10	hypothetical protein
Rv1872c	lldD2	122	1	0.000504275	7	L-lactate dehydrogenase (cytochrome) LldD2
Rv1875	0	42	20	0.000850782	10	hypothetical protein
Rv1877	0	6	6	0.044882	3	hypothetical protein
Rv1936	0	36	26	1.57401e-07	7	monooxygenase
Rv1937	0	9	7	0.04515	7	oxygenase
Rv1985c	0	35	18	0.00100231	9	chromosome replication initiation inhibitor protein
Rv1990A	0	12	8	0.0422736	7	dehydrogenase
Rv1993c	0	32	18	0.000440189	10	hypothetical protein
Rv2007c	fdxA	162	3	0.000489361	7	ferredoxin FDXA
Rv2030c	0	88	1	0.0161375	10	hypothetical protein
Rv2031c	hspX	124	1	0.000517477	0	heat shock protein hspX
Rv2032	acg	90	1	0.0168661	10	hypothetical protein
Rv2035	0	61	0	0.0384668	10	hypothetical protein
Rv2050	0	274	8	1.46485e-05	10	hypothetical protein
Rv2053c	fxsA	120	3	0.0154756	3	FxsA protein
Rv2137c	0	110	1	0.00216515	10	hypothetical protein
Rv2244	acpP	340	3	2.39556e-12	1	acyl carrier protein
Rv2245	kasA	228	2	7.44507e-08	1	3-oxoacyl-ACP synthase
Rv2332	mez	12	9	0.0130992	7	malate dehydrogenase
Rv2352c	PPE38	22	12	0.0123693	6	PPE family protein
Rv2517c	0	180	6	0.00424831	10	hypothetical protein
Rv2623	TB31.7	642	21	1.0033e-12	0	hypothetical protein
Rv2625c	0	99	1	0.00619421	3	hypothetical protein
Rv2626c	0	80	0	0.00648993	10	hypothetical protein
Rv2629	0	115	2	0.00644796	10	hypothetical protein
Rv2641	cadI	42	42	1.03707e-15	10	cadmium inducible protein CADI
Rv2643	arsC	14	9	0.0267006	3	arsenic-transport integral membrane protein ArsC
Rv2699c	0	537	8	5.64575e-17	10	hypothetical protein
Rv2707	0	108	80	1.83385e-24	10	hypothetical protein
Rv2711	ideR	206	47	0.0410046	9	IRON-dependent repressor and activator IDER
Rv2731	0	9	8	0.0130389	10	hypothetical protein
Rv2744c	35kd_ag	523	21	3.30738e-08	10	hypothetical protein
Rv2745c	0	1378	50	9.65267e-26	9	transcriptional regulatory protein
Rv2785c	rpsO	77	1	0.0450244	2	30S ribosomal protein S15
Rv2913c	0	157	1	1.26146e-05	7	D-amino acid aminohydrolase
Rv3018c	PPE46	18	12	0.00373896	6	PPE family protein
Rv3021c	PPE47	16	11	0.00591289	6	PPE family protein
Rv3052c	nrdI	149	5	0.0154544	2	ribonucleotide reductase stimulatory protein
Rv3054c	0	219	10	0.0118462	10	hypothetical protein
Rv3134c	0	84	1	0.0230453	0	hypothetical protein
Rv3206c	moeB1	92	58	2.64968e-15	7	molybdopterin biosynthesis-like protein MoeZ
Rv3219	whiB1	393	8	1.59185e-10	9	transcriptional regulatory protein WHIB-like WHIB1
Rv3220c	0	17	16	1.46484e-05	9	two component sensor kinase
Rv3221A	0	140	59	7.42598e-10	2	anti-sigma factor
Rv3221c	TB7.3	84	66	4.48515e-21	1	acetyl-CoA carboxylase biotin carboxyl carrier protein subunit
Rv3222c	0	125	93	1.33287e-28	10	hypothetical protein
Rv3223c	sigH	133	39	0.00215423	2	RNA polymerase sigma factor RpoE
Rv3249c	0	61	0	0.0384668	9	TetR family transcriptional regulator
Rv3250c	rubB	411	4	7.67226e-15	7	rubredoxin RubB
Rv3251c	rubA	216	0	7.62878e-10	7	rubredoxin RUBA
Rv3252c	alkB	169	2	3.49857e-05	1	transmembrane alkane 1-monooxygenase AlkB
Rv3269	0	272	8	1.44603e-05	0	hypothetical protein
Rv3385c	0	35	17	0.00274661	0	hypothetical protein
Rv3407	0	140	5	0.0380959	0	hypothetical protein
Rv3460c	rpsM	84	1	0.0230453	2	30S ribosomal protein S13
Rv3526	0	91	1	0.0118133	7	oxidoreductase
Rv3583c	0	206	11	0.0487598	9	transcription factor
Rv3597c	lsr2	44	22	0.000196787	2	iron-regulated LSR2 protein precursor
Rv3615c	0	79	1	0.0456524	3	hypothetical protein
Rv3616c	0	100	1	0.00618451	3	hypothetical protein
Rv3679	0	125	3	0.0118411	3	anion transporter ATPase
Rv3872	PE35	105	29	0.0386339	6	PE family-like protein
Rv3875	esxA	135	51	3.16061e-07	3	hypothetical protein
Rv3920c	0	87	1	0.0244484	10	hypothetical protein

## Sheet: Upregulted DNRP2 vs DNRP1
Supplementary Table S3 (Cont): RPKM values and functional categories of overexpressed M. tuberculosis genes
Gene	Gene-name	DNRP1-RPKMs	DNRP2-RPKMs	FDR	Functional Categories	Description
Rv0142	0	12	13	6.82497e-05	10	hypothetical protein
Rv0989c	grcC2	9	10	0.000950932	7	polyprenyl synthetase
Rv1224	tatB	88	106	3.37271e-45	3	sec-independent translocase
Rv1228	lpqX	6	14	1.75479e-07	3	lipoprotein LpqX
Rv1259	0	6	21	5.81675e-13	2	hypothetical protein
Rv1260	0	4	13	1.23289e-07	7	hypothetical protein
Rv1265	0	29	39	3.04573e-17	10	hypothetical protein
Rv1510	0	5	7	0.00644566	3	hypothetical protein
Rv1801	PPE29	31	25	7.06578e-08	6	PPE family protein
Rv1802	PPE30	6	8	0.00292732	6	PPE family protein
Rv1806	PE20	36	42	3.0053e-17	6	PE family protein
Rv1807	PPE31	65	66	3.40159e-25	6	PPE family protein
Rv1831	0	98	385	2.89327e-262	10	hypothetical protein
Rv2549c	0	6	19	2.35105e-11	0	hypothetical protein
Rv2550c	0	22	30	2.9873e-13	0	hypothetical protein
Rv2551c	0	8	60	1.00416e-44	10	hypothetical protein
Rv2552c	aroE	14	65	1.43433e-44	7	shikimate 5-dehydrogenase
Rv2553c	0	17	48	1.14719e-28	3	hypothetical protein
Rv2554c	0	17	107	2.13644e-78	10	Holliday junction resolvase-like protein
Rv2555c	alaS	91	369	2.53049e-253	2	alanyl-tRNA synthetase
Rv2615c	PE_PGRS45	5	8	0.00150312	6	PE-PGRS family protein
Rv2642	0	17	17	3.90428e-06	9	ArsR family transcriptional regulator
Rv2676c	0	7	8	0.00532117	10	hypothetical protein
Rv2709	0	10	21	4.74072e-11	3	transmembrane protein
Rv3014c	ligA	2	7	0.000546102	2	NAD-dependent DNA ligase LigA
Rv3015c	0	2	11	3.38621e-07	10	hypothetical protein
Rv3017c	esxQ	7	27	3.17297e-17	3	Esat-6 like protein esxQ (TB12.9) (Esat-6 like protein 8)
Rv3201c	0	3	6	0.00714408	2	ATP-dependent DNA helicase
Rv3202c	0	3	12	2.13026e-07	2	ATP-dependent DNA helicase
Rv3205c	0	89	119	8.36772e-54	10	hypothetical protein
Rv3471c	0	2	9	1.46961e-05	10	hypothetical protein
Rv3473c	bpoA	1	5	0.0060431	0	peroxidase

[truncated: 2 more sheets: Upregulated FNRP1 vs FNRP2, Upregulated FNRP2 vs FNRP1]
